# Supplementary material for: Diffuse Optical Spectroscopy Assessment of Resting Oxygen Metabolism in the Leg Musculature
Source: MDPI journal article supplement (doi:10.3390/metabo11080496), 2021-07-29
Supplement: s1 [file s1]

# Supplementary Materials:

**Table S1. Correlation statistics for all source-detector separations**, including Pearson's R, concordance correlation coefficient, and associated p-value. The linear model used to describe the relationship between the NIRS-only arterial occlusion measure (VO<sub>2AO</sub>) and the NIRS-only venous occlusion measure (VO<sub>2VO</sub>) is described by the slope (standard error) and intercept (standard error).

| Source-detector separation              |                                                                                                  |                                                                                                  |                                                                                                  |                                                                                                  |
|-----------------------------------------|--------------------------------------------------------------------------------------------------|--------------------------------------------------------------------------------------------------|--------------------------------------------------------------------------------------------------|--------------------------------------------------------------------------------------------------|
|                                         | 3.5 cm                                                                                           | 3 cm                                                                                             | 2.5 cm                                                                                           | 2 cm                                                                                             |
| VO <sub>2VO</sub> vs. VO <sub>2i</sub>  | R <sup>2</sup> = 0.16<br>p = 0.021                                                               | R <sup>2</sup> = 0.052<br>p = 0.202                                                              | R <sup>2</sup> = 0.056<br>p = 0.184                                                              | R <sup>2</sup> = 0.024<br>p = 0.390                                                              |
| VO <sub>2AO</sub> vs. VO <sub>2VO</sub> | R <sup>2</sup> = 0.31<br>p < 0.001<br>CCC = 0.40<br>Slope = 1.01(0.26)<br>Intercept = 0.01(0.01) | R <sup>2</sup> = 0.19<br>p = 0.008<br>CCC = 0.32<br>Slope = 0.79(0.27)<br>Intercept = 0.02(0.01) | R <sup>2</sup> = 0.15<br>p = 0.021<br>CCC = 0.25<br>Slope = 0.75(0.31)<br>Intercept = 0.02(0.01) | R <sup>2</sup> = 0.09<br>p = 0.075<br>CCC = 0.21<br>Slope = 0.51(0.28)<br>Intercept = 0.02(0.01) |
| VO <sub>2AO</sub> vs. VO <sub>2i</sub>  | R <sup>2</sup> = 0.33<br>p < 0.001                                                               | R <sup>2</sup> = 0.33<br>p < 0.001                                                               | R <sup>2</sup> = 0.28<br>p = 0.002                                                               | R <sup>2</sup> = 0.27<br>p = 0.002                                                               |
| BF vs. BFI                              | R <sup>2</sup> = 0.61<br>p < 0.001                                                               | R <sup>2</sup> = 0.58<br>p < 0.001                                                               | R <sup>2</sup> = 0.61<br>p < 0.001                                                               | R <sup>2</sup> = 0.62<br>p < 0.001                                                               |

**Table S2. Repeatability of oxygen metabolism and blood flow measurements for all source-detector separations.** Intraclass correlation coefficients (ICC) and coefficient of variation (CV) for oxygen metabolism measured during arterial occlusion and venous occlusion (VO<sub>2AO</sub> and VO<sub>2VO</sub>, respectively), as well as oxygen metabolism index (VO<sub>2i</sub>), blood flow measured during venous occlusion (BF), and blood flow index (BFI). Note that only one source-detector separation was used for BFI (2.5 cm).

| Source-detector Separation |     | VO <sub>2AO</sub> | VO <sub>2VO</sub> | VO <sub>2i</sub> | BF          | BFI         |
|----------------------------|-----|-------------------|-------------------|------------------|-------------|-------------|
| 3.5 cm                     | ICC | 0.88              | 0.85              | 0.77             | 0.83        | NA          |
|                            | CV  | 0.19 ± 0.13       | 0.24 ± 0.13       | 0.24 ± 0.09      | 0.27 ± 0.12 | NA          |
| 3 cm                       | ICC | 0.81              | 0.84              | 0.76             | 0.85        | NA          |
|                            | CV  | 0.24 ± 0.18       | 0.27 ± 0.18       | 0.24 ± 0.10      | 0.29 ± 0.13 | NA          |
| 2.5 cm                     | ICC | 0.69              | 0.77              | 0.77             | 0.85        | 0.62        |
|                            | CV  | 0.31 ± 0.22       | 0.31 ± 0.22       | 0.24 ± 0.10      | 0.32 ± 0.16 | 0.25 ± 0.11 |
| 2 cm                       | ICC | 0.68              | 0.78              | 0.78             | 0.85        | NA          |
|                            | CV  | 0.34 ± 0.20       | 0.31 ± 0.20       | 0.25 ± 0.10      | 0.32 ± 0.23 | NA          |
